# Supplementary material for: National Institutes of Health Stroke Scale: An Alternative Primary Outcome Measure for Trials of Acute Treatment for Ischemic Stroke
Source: PubMed Central journal article supplement — Stroke. 2019 Dec 4;51(1):282–90. doi: 10.1161/STROKEAHA.119.026791 (PMC6924951; doi:10.1161/strokeaha.119.026791), 2019-12-04
Supplement: str-51-282-s001.pdf [file str-51-282-s001.pdf]

## **Supplemental Material**

NIH Stroke Scale: an alternative primary outcome measure for trials of acute treatment for ischemic stroke

Vicky Chalos, MD; Nadinda A.M. van der Ende, MD; Hester F. Lingsma, PhD; Maxim J.H.L. Mulder, MD, PhD; Esmee Venema, MD; Simone A. Dijkland, MD; Olvert A. Berkhemer, MD, PhD; Albert J. Yoo, MD, PhD; Joseph P. Broderick, MD, PhD; Yuko Y. Palesch, PhD; Sharon D. Yeatts, PhD; Yvo B.W.E.M. Roos, MD, PhD; Robert J. van Oostenbrugge, MD, PhD; Wim H. van Zwam, MD, PhD; Charles B.L.M. Majoie, MD, PhD; Aad van der Lugt, MD, PhD; Bob Roozenbeek, MD, PhD; Diederik W.J. Dippel, MD, PhD; on behalf of the MR CLEAN Investigators

**Table I. Sensitivity analysis: Application of the causal mediation model in MR CLEAN and IMS III, in which NIHSS scores of deceased patients were imputed by multiple imputation with regression.\***

|                 | Pathway c<br>Effect of EVT on<br>mRS (acOR) | Pathway a<br>Effect of EVT on NIHSS (a $\beta$ ) |                   | Pathway b<br>Correlation between NIHSS and mRS<br>adjusted for EVT (acOR $\ddagger$ ) |                     | Pathway c'<br>Effect of EVT on mRS<br>adjusted for NIHSS (acOR) |                     |
|-----------------|---------------------------------------------|--------------------------------------------------|-------------------|---------------------------------------------------------------------------------------|---------------------|-----------------------------------------------------------------|---------------------|
|                 |                                             | NIHSS 24 hours                                   | NIHSS 5-7 days    | NIHSS 24 hours                                                                        | NIHSS 5-7 days      | NIHSS 24 hours                                                  | NIHSS 5-7 days      |
| <b>MR CLEAN</b> | 1.68 (1.22 to 2.32)                         | -19% (-28 to -9.2) $\dagger$                     | -27% (-37 to -15) | 0.80 (0.77 to 0.82)                                                                   | 0.78 (0.76 to 0.81) | 1.30 (0.93 to 1.82)                                             | 1.16 (0.82 to 1.66) |
| <b>IMS III</b>  | 1.30 (0.97 to 1.75)                         | -1.3% (-15 to 14)                                | -6.1% (-21 to 11) | 0.80 (0.78 to 0.82)                                                                   | 0.80 (0.78 to 0.83) | N/A                                                             | N/A                 |

Abbreviations: a $\beta$  = adjusted regression coefficient beta. acOR = adjusted common odds ratio. CI = confidence interval. EVT = endovascular treatment. IMS III = Interventional Management of Stroke III trial. MR CLEAN = Multicenter Randomized Clinical Trial of Endovascular Treatment for Acute Ischemic Stroke in the Netherlands. mRS = modified Rankin Scale. N/A = not applicable. NIHSS = National Institutes of Health Stroke Scale.

\*All acORs and a $\beta$ s are reported with their 95% confidence intervals. All pathways are adjusted for age, baseline NIHSS, collateral score, time from symptom onset to randomization. Pathway b and c' are additionally adjusted for sex, pre-stroke mRS, diabetes mellitus, hypertension, ischemic stroke, atrial fibrillation, ICA-T occlusion, IVT (in MR CLEAN only). Pathway c' was not tested in IMS III since no significant treatment effect was found on pathway c.  $\dagger$ Interpretation of a $\beta$ : a patient with an NIHSS score of 15 at 24 hours after treatment with usual care alone, would have an NIHSS score of 12 at 24 hours when treated with EVT + usual care (15-15\*0.19).  $\ddagger$ Expressed as an acOR for every 10% increase in the NIHSS.

**Table II. Unadjusted results of treatment effect on the mRS and NIHSS in MR CLEAN and IMS III.\***

|                 | Pathway c<br>Effect of EVT on mRS (cOR) | Pathway a<br>Effect of EVT on NIHSS ( $\beta$ ) |                   |
|-----------------|-----------------------------------------|-------------------------------------------------|-------------------|
|                 |                                         | NIHSS 24 hours                                  | NIHSS 5-7 days    |
| <b>MR CLEAN</b> | 1.66 (1.21 to 2.28)                     | -19% (-30 to -7.7) <sup>†</sup>                 | -1.9% (-13 to 19) |
| <b>IMS III</b>  | 1.14 (0.86 to 1.51)                     | -27% (-39 to -12)                               | -4.2% (-21 to 16) |

Abbreviations:  $\beta$  = regression coefficient beta. cOR = common odds ratio. CI = confidence interval. EVT = endovascular treatment. IMS III = Interventional Management of Stroke III trial. MR CLEAN = Multicenter Randomized Clinical Trial of Endovascular Treatment for Acute Ischemic Stroke in the Netherlands. mRS = modified Rankin Scale. NIHSS = National Institutes of Health Stroke Scale.

\*All cORs and  $\beta$ s are reported with their 95% confidence intervals. <sup>†</sup>Interpretation of  $\beta$ : a patient with an NIHSS score of 15 at 24 hours after treatment with usual care alone, would have an NIHSS score of 12 at 24 hours when treated with EVT + usual care ( $15 - 15 \times 0.19$ ).

**Figure I. ROC-curves (A-D) with their area under the curve for NIHSS at 24 hours and 5-7 days predicting mRS 0-2 in MR CLEAN and IMS III.\***

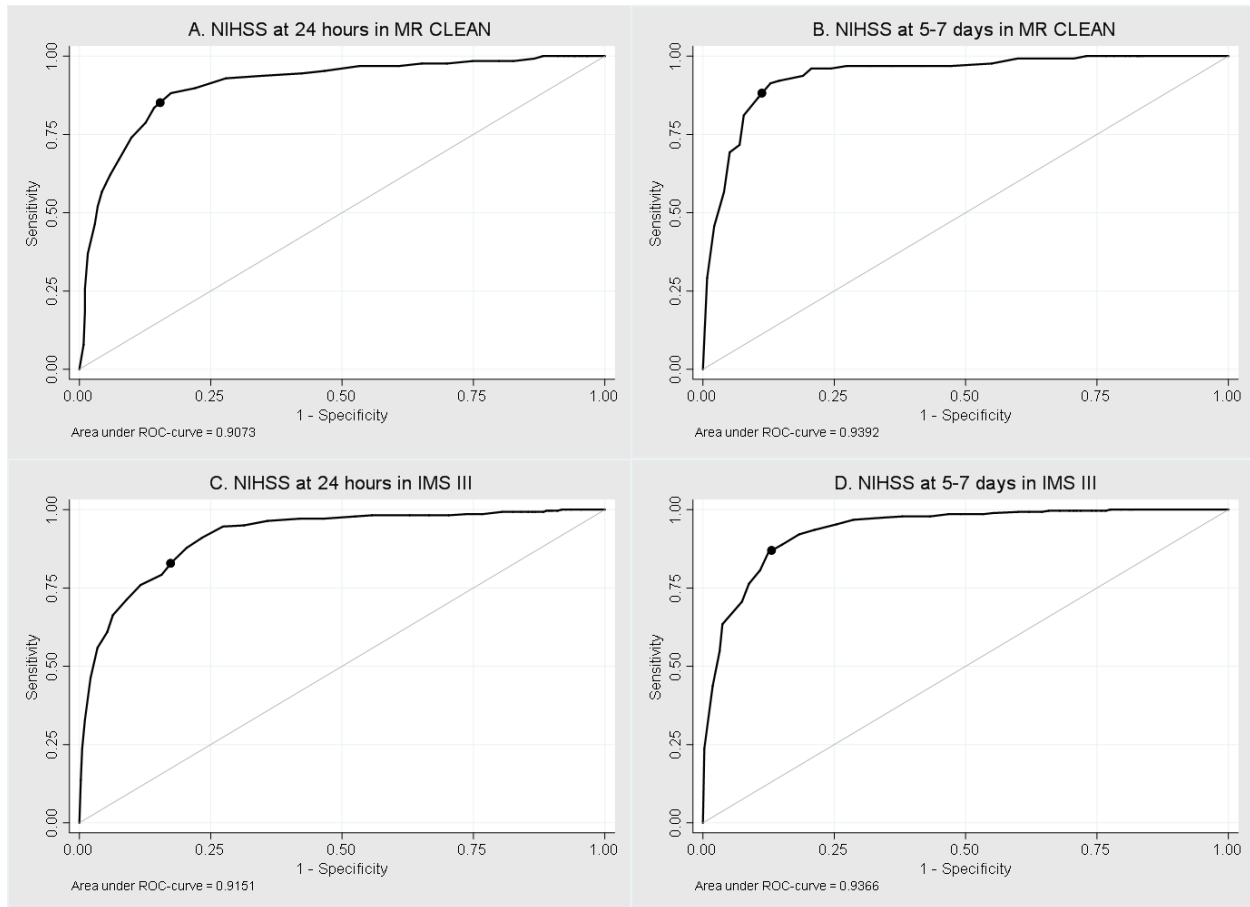

Abbreviations: IMS III = Interventional Management of Stroke III trial. MR CLEAN = Multicenter Randomized Clinical Trial of Endovascular Treatment for Acute Ischemic Stroke in the Netherlands. mRS = modified Rankin Scale. NIHSS = National Institutes of Health Stroke Scale. ROC = receiver operating characteristic.

\*ROC-curves A-D of set 1 of 5 imputed data sets are provided. The black markers in curves A-D show the optimal cut-off point of the sensitivity and specificity of the NIHSS for mRS 0-2, which are mentioned in the manuscript.

**Figure II. Distribution of NIHSS (A,B) and log10-transformed NIHSS+1 (C,D) at 24 hours in MR CLEAN in the main analysis (A,C) and sensitivity analysis (B,D).\***

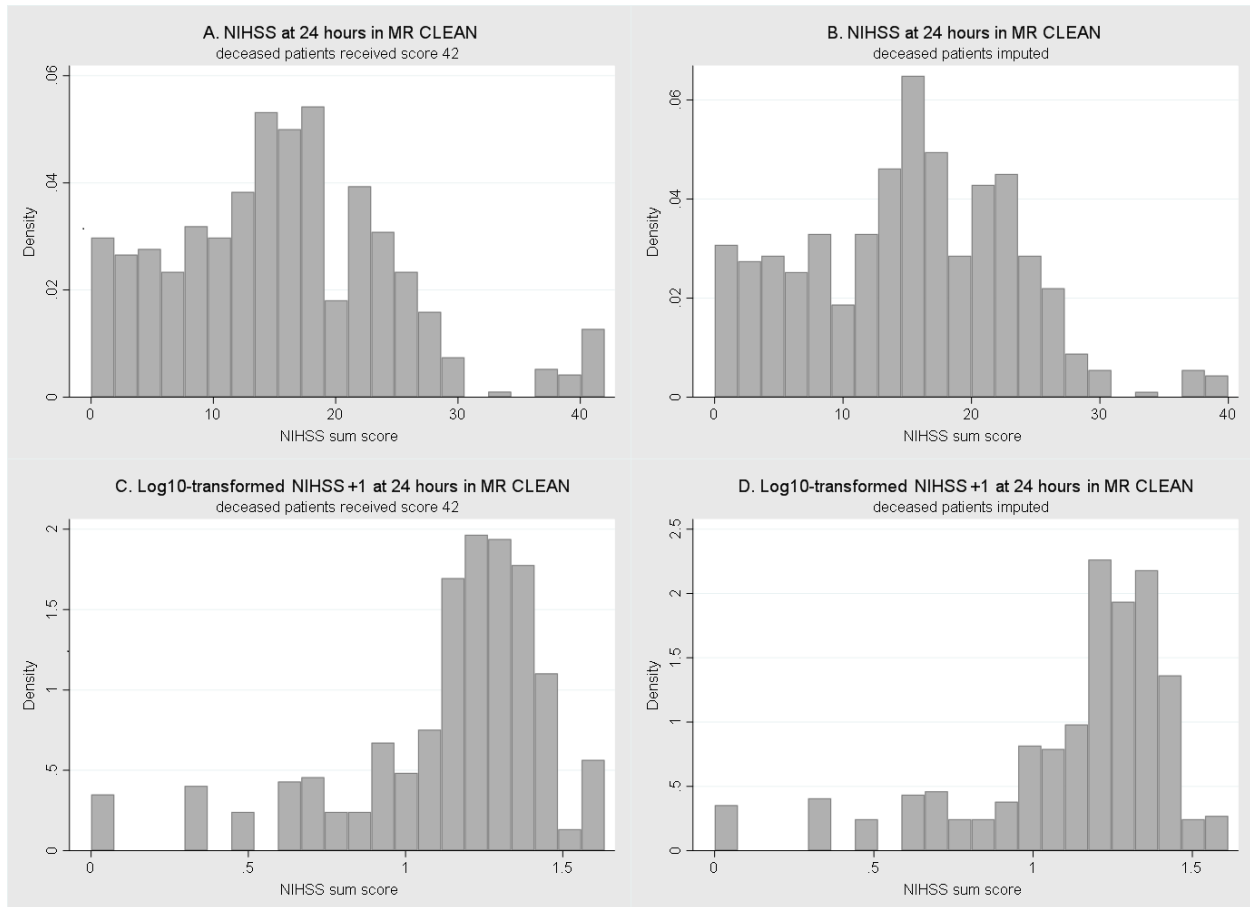

Abbreviations: MR CLEAN = Multicenter Randomized Clinical Trial of Endovascular Treatment for Acute Ischemic Stroke in the Netherlands. NIHSS = National Institutes of Health Stroke Scale.

\*Deceased patients were assigned the maximum NIHSS score of 42 in the main analysis; deceased patients were imputed by multiple imputation with regression in the sensitivity analysis.

**Figure III. Distribution of NIHSS (A,B) and log10-transformed NIHSS+1 (C,D) at 5-7 days in MR CLEAN in the main analysis (A,C) and sensitivity analysis (B,D.)\***

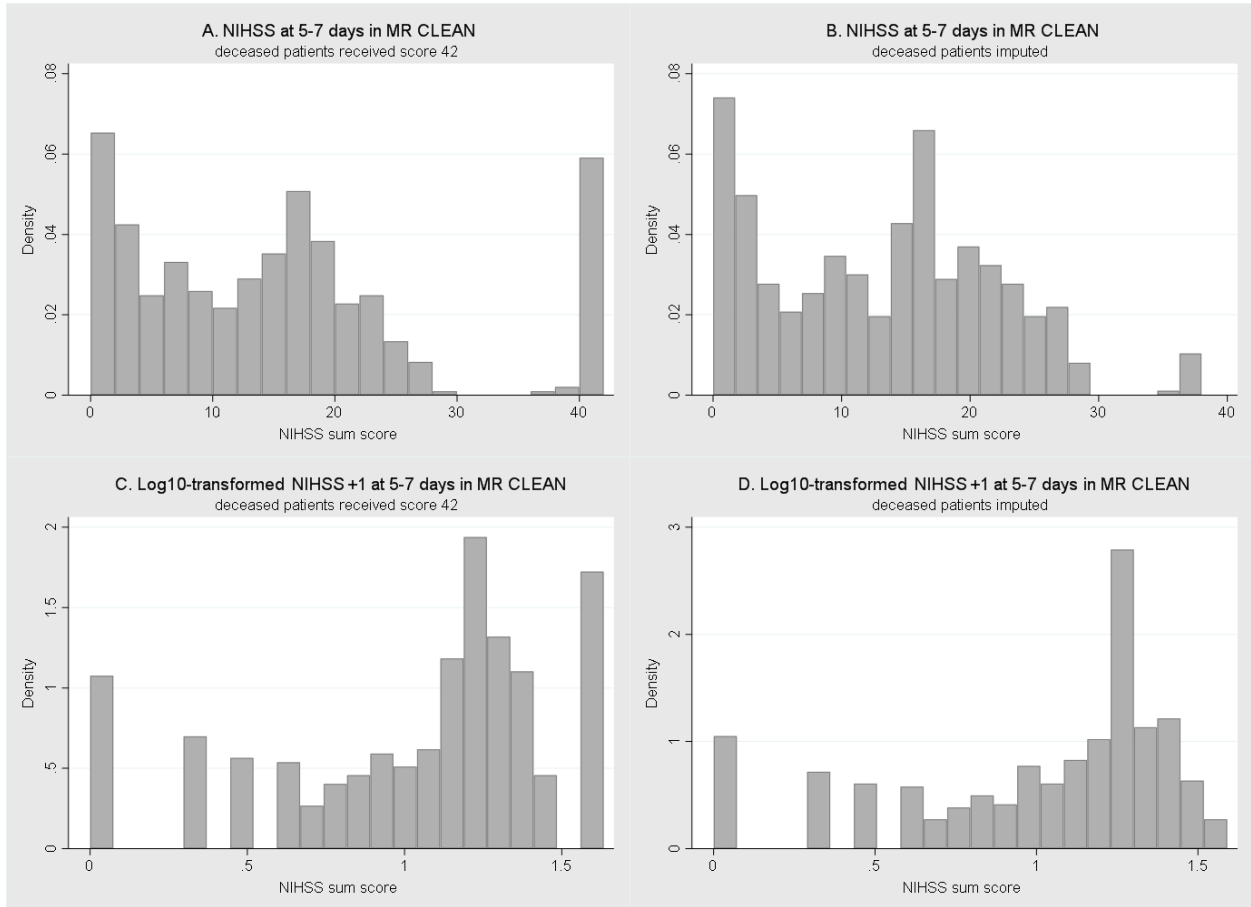

Abbreviations: MR CLEAN = Multicenter Randomized Clinical Trial of Endovascular Treatment for Acute Ischemic Stroke in the Netherlands. NIHSS = National Institutes of Health Stroke Scale.

\*Deceased patients were assigned the maximum NIHSS score of 42 in the main analysis; deceased patients were imputed by multiple imputation with regression in the sensitivity analysis.

**Figure IV. Distribution of NIHSS (A,B) and log10-transformed NIHSS+1 (C,D) at 24 hours in IMS III in the main analysis (A,C) and sensitivity analysis (B,D).\***

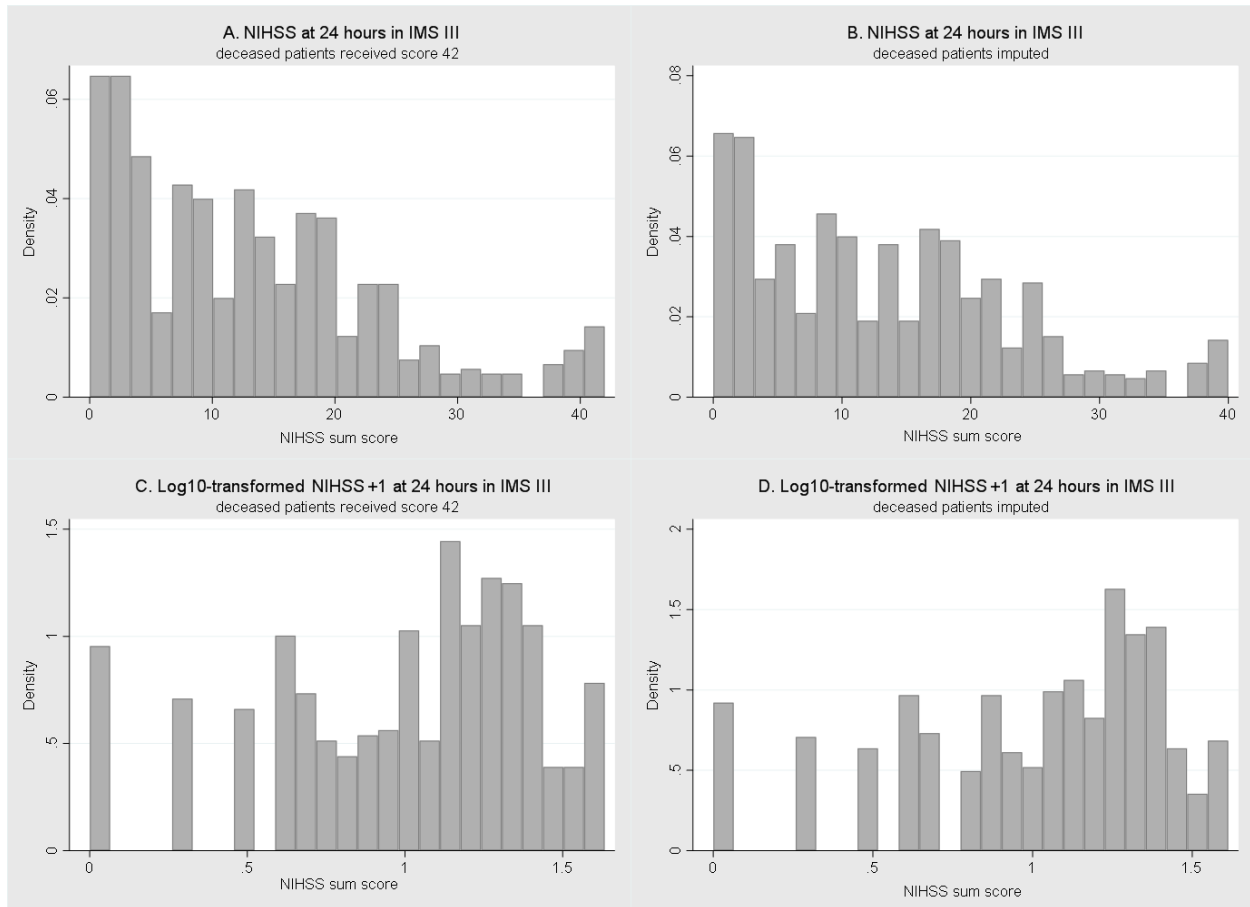

Abbreviations: IMS III = Interventional Management of Stroke III trial. NIHSS = National Institutes of Health Stroke Scale.

\*Deceased patients were assigned the maximum NIHSS score of 42 in the main analysis; deceased patients were imputed by multiple imputation with regression in the sensitivity analysis.

**Figure V. Distribution of NIHSS (A,B) and log10-transformed NIHSS+1 (C,D) at 5-7 days in IMS III in the main analysis (A,C) and sensitivity analysis (B,D).\***

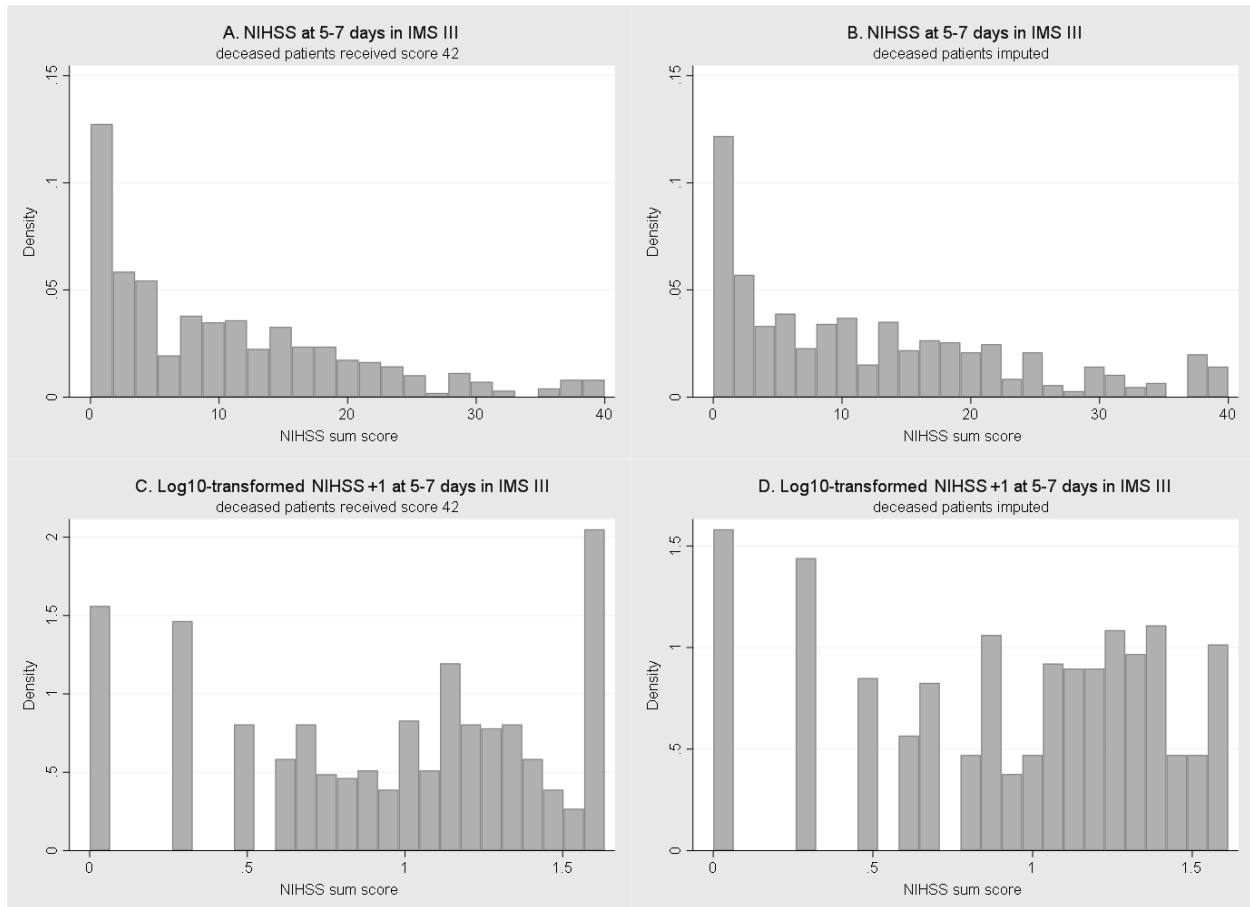

Abbreviations: IMS III = Interventional Management of Stroke III trial. NIHSS = National Institutes of Health Stroke Scale.

\*Deceased patients were assigned the maximum NIHSS score of 42 in the main analysis; deceased patients were imputed by multiple imputation with regression in the sensitivity analysis.
