# Supplementary material for: National Institutes of Health Stroke Scale: An Alternative Primary Outcome Measure for Trials of Acute Treatment for Ischemic Stroke
Source: PubMed Central journal article supplement — Stroke. 2019 Dec 4;51(1):282–90. doi: 10.1161/STROKEAHA.119.026791 (PMC6924951; doi:10.1161/strokeaha.119.026791), 2019-12-04
Supplement: str-51-282-s002.pdf [file str-51-282-s002.pdf]

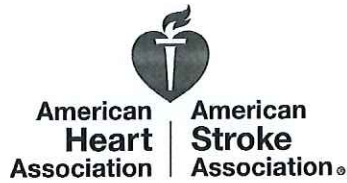

## Acknowledgment Permission Form

---

**Journal** Stroke

**Manuscript Number** STROKE/2019/026791R1

**First Author** Vicky Chalos

**Title of Work** NIH Stroke Scale: an alternative primary outcome measure for trials of acute treatment for ischemic stroke

Authors must provide written permission/approval from all individuals mentioned by name in the Acknowledgments section of a submitted manuscript. By signing this form, any and all acknowledged persons therefore state that they have read and approved the mention of their names in the Acknowledgment section of the aforementioned paper.

|           |                      |           |                    |      |                 |
|-----------|----------------------|-----------|--------------------|------|-----------------|
| Name (1)  | <u>Sonya Swanson</u> | Signature | <u>[Signature]</u> | Date | <u>31/10/19</u> |
| Name (2)  | _____                | Signature | _____              | Date | _____           |
| Name (3)  | _____                | Signature | _____              | Date | _____           |
| Name (4)  | _____                | Signature | _____              | Date | _____           |
| Name (5)  | _____                | Signature | _____              | Date | _____           |
| Name (6)  | _____                | Signature | _____              | Date | _____           |
| Name (7)  | _____                | Signature | _____              | Date | _____           |
| Name (8)  | _____                | Signature | _____              | Date | _____           |
| Name (9)  | _____                | Signature | _____              | Date | _____           |
| Name (10) | _____                | Signature | _____              | Date | _____           |
| Name (11) | _____                | Signature | _____              | Date | _____           |
| Name (12) | _____                | Signature | _____              | Date | _____           |
| Name (13) | _____                | Signature | _____              | Date | _____           |
| Name (14) | _____                | Signature | _____              | Date | _____           |
| Name (15) | _____                | Signature | _____              | Date | _____           |
| Name (16) | _____                | Signature | _____              | Date | _____           |
| Name (17) | _____                | Signature | _____              | Date | _____           |
| Name (18) | _____                | Signature | _____              | Date | _____           |
| Name (19) | _____                | Signature | _____              | Date | _____           |
| Name (20) | _____                | Signature | _____              | Date | _____           |
